# Supplementary material for: Characterization of a new splicing variant of powdery mildew resistance gene Pm4 in synthetic hexaploid wheat YAV249
Source: Front Plant Sci. 2022 Oct 26;13:1048252. doi: 10.3389/fpls.2022.1048252 (PMC9644285; doi:10.3389/fpls.2022.1048252)
Supplement: Supplementary Table 1 — Validation of the flanked markers GDM93 and WGRC763 and the co-segregated markers BCD1231 and JS717/JS718 of PmYAV on 192 wheat accessions in marker-assisted selection (MAS). ‘+’ amplified marker allele differs from that in YAV249, indicating that the marker might be useful in MAS, and ‘−’ marker is similar to that in YAV249, indicating that the marker could not be used in MAS. [file Table_1.xlsx]

## Sheet: Table S1
No.	Accessions	GDM93	WGRC763	BCD1231	JS717/JS718
1	Youzimai	-	+	+	+
2	Bima1	+	+	+	+
3	Huangxiandalibanmang	+	+	+	+
4	Xuzhou438	-	+	+	+
5	Mazhamai	+	+	+	+
6	Beijing8	+	+	+	+
7	Jiangdongmen	-	+	+	+
8	Xinong6028	-	+	+	+
9	Zaoyangmai	+	+	+	+
10	Chengdongguangtou	-	+	+	+
11	Bima4	+	+	+	+
12	Nanda2419	-	+	+	+
13	Shijiazhuang54	+	+	+	+
14	Lovrin10	+	+	+	+
15	Abo	+	+	+	+
16	Taishan1	+	+	+	+
17	Afu	+	+	+	+
18	Boai7023	+	+	+	+
19	Fengchan 3	+	+	+	+
20	Lumai1	+	+	+	+
21	Moba66	+	+	+	+
22	Wuyimai	-	+	+	+
23	Bainong3217	-	+	+	+
24	Jimai19	+	+	+	+
25	Chuanmai42	-	+	+	+
26	Ourou	+	+	+	+
27	Lumai21	+	+	+	+
28	Aimengniu	+	+	+	+
29	Zhengmai9023	+	+	+	+
30	Aifeng3	+	+	+	+
31	Fan6	+	+	+	+
32	Jimai22	+	+	+	+
33	Lumai14	+	+	+	+
34	Yumai2	-	+	+	+
35	Yangmai158	+	+	+	+
36	Yumai18	+	+	+	+
37	Zhou8425B	+	+	+	+
38	Liangxing66	+	+	+	+
39	Liangxing99	+	+	+	+
40	Tainong18	+	+	+	+
41	Tainong19	+	+	+	+
42	Shannong17	+	+	+	+
43	Shannong21	+	+	+	+
44	Wennong14	+	+	+	+
45	Luyuan502	-	+	+	+
46	Shi4185	+	+	+	+
47	Shiyou17	+	+	+	+
48	Shimai18	+	+	+	+
49	Shixin633	+	+	+	+
50	Ji5265	+	+	+	-
51	Gao8901	-	+	+	+
52	Henong827	-	+	+	+
53	Han6172	-	+	+	+
54	Han7086	-	+	+	+
55	Kenong199	+	+	+	+
56	Luomai21	+	-	-	-
57	Zhengyumai9989	+	+	+	+
58	Zhou16	+	+	+	+
59	Zhou18	-	+	+	+
60	Zhou9823	-	+	+	+
61	Zhengyin4	+	+	+	+
62	Xiaoyan5	-	+	+	+
63	Gaoyou503	+	+	+	+
64	Jinmai41	+	+	+	+
65	Ligao6	+	+	+	+
66	Shan150	-	+	+	+
67	Shan213	-	+	+	+
68	Xinong8727	-	+	+	+
69	Xiaoyan54	-	+	+	+
70	Xuzhou26	+	+	+	+
71	Yuanfeng175	+	+	+	+
72	Zhengnong16	+	+	+	+
73	Baichun5	+	+	+	-
74	Changhan58	+	+	+	+
75	Changwu131	+	+	+	+
76	Heng4444	+	+	+	+
77	Jinmai60	+	+	+	+
78	Kenong213	+	+	+	+
79	Linyou145	+	+	+	+
80	Nongda1193	+	-	+	+
81	Nongda179	+	+	+	+
82	Nongda195	+	+	+	+
83	Shan160	+	+	+	+
84	Shan229	+	+	+	+
85	Shan354	+	+	+	+
86	Shannong28	+	+	+	+
87	Xinong2611	+	+	+	+
88	Xinong881	+	+	+	+
89	Xinong889	-	+	+	+
90	Xiaoyan81	-	+	+	+
91	Zhoumai19	-	+	+	+
92	Zhouyuan9369	+	+	+	+
93	Shan253	+	-	-	+
94	Xinong22008	-	+	+	+
95	Ph3295	+	+	+	+
96	Henong5290	+	+	+	+
97	Shanmai139	+	-	+	+
98	Xinong928	+	+	+	+
99	Xinong979	+	+	+	+
100	Xinmai1998	-	-	-	-
101	Yannong19	+	+	+	+
102	Yannong21	+	+	+	+
103	Yannong24	+	+	+	+
104	Zhengmai9405	+	+	-	+
105	Xiaoyan597	-	+	+	+
106	Xinong2000-7	+	+	+	+
107	Gaoyuan338	+	+	+	+
108	Atr-Sv	+	+	+	+
109	C.I.9342	+	+	-	-
110	Magnifg	+	+	+	+
111	Hongtoumai	-	+	-	-
112	Honghuaxiaomai	+	+	+	+
113	Luzi0895057	+	-	-	-
114	Sc792197	-	+	+	+
115	Tong80(12)-22	+	-	-	-
116	Xingnong9	+	+	+	+
117	Qianhuan2	+	-	-	-
118	Zhengzhou872	+	+	+	+
119	Guinong10	+	-	-	-
120	Yang9290	+	-	-	-
121	Xiaoyehong	-	+	+	+
122	Xingzhuai1	+	-	-	-
123	Luzi0895055	+	-	-	-
124	Hongmangmai	-	+	-	-
125	Hongyanglazi	-	+	+	+
126	Hulutou	-	+	+	+
127	Zg2463/74	-	+	+	+
128	Redegyptiantype	+	+	+	+
129	Valselva	+	+	+	+
130	Steinwedeltimxdundeeii	-	+	+	+
131	Oax93.25.37	-	+	+	+
132	Mex94.7.43	+	+	+	+
133	Cincana	+	-	-	-
134	Guandum-Sockhay	+	+	+	+
135	Yr17/6*Avocets	+	+	+	+
136	Tukaminia	+	+	+	+
137	Roane	-	-	-	-
138	Alson	-	+	+	+
139	P961341	-	+	+	+
140	Turbo	+	-	-	-
141	Grandin	+	+	+	+
142	Safha3	-	-	-	-
143	Kenya	+	+	+	+
144	Mieti	+	+	+	+
145	De8661	+	-	-	-
146	Guadalupe	+	+	+	-
147	Longbow	+	+	+	-
148	Hussar	+	-	-	-
149	Rendezous	+	-	-	-
150	Xiaoziganzi	+	-	-	-
151	XJ5	+	-	+	-
152	CA9722	+	-	-	-
153	Zhongmai175	+	+	+	+
154	Zhongyou206	+	+	+	+
155	Jingyang60	-	+	+	+
156	Weimai4	+	+	-	-
157	Jimai22	+	+	+	+
158	Taimaiyi	+	+	+	+
159	Yz4110	+	-	-	-
160	Aikang58	-	-	-	-
161	Dong2-23	+	-	-	-
162	Dong2-8	+	-	-	-
163	Dong3-6	-	+	+	+
164	Fengdecunmai1	+	-	-	-
165	Kaimai21	+	-	-	-
166	Luomai26	+	-	-	-
167	Taixue12	-	-	-	-
168	Tianping3	+	-	-	-
169	Xinxiang9178	+	-	-	-
170	Xinyang12	+	-	-	-
171	Yan893xuan	+	-	-	-
172	Yanzhan4110	+	-	-	-
173	Yanzhan1	+	-	-	-
174	Yumai16	+	-	-	-
175	Yunong949	+	-	-	-
176	Zhengzhou8960	+	-	-	-
177	Zhongjiao1	+	-	-	-
178	Zhongjiao2	+	-	-	-
179	Zhongjiao3	+	-	-	-
180	Zhongluo08-2	+	-	-	-
181	Chuanmai22	+	-	-	-
182	Mianmai40	+	-	-	-
183	Mianmai41	+	-	-	-
184	Mianmai43	+	-	-	-
185	Mianmai48	+	-	-	-
186	Mianyang38	+	-	-	-
187	Xingyi4	+	-	-	-
188	Dongmai18	+	-	-	-
189	Yangmai13	+	+	-	-
190	Yangmai17	+	-	-	-
191	Zhenmai9	+	+	+	+
192	Saltinaimya	+	+	+	+
